# Supplementary material for: Genipin Crosslinks the Extracellular Matrix to Rescue Developmental and Degenerative Defects, and Accelerates Regeneration of Peripheral Neurons
Source: PubMed Central journal article supplement — bioRxiv. 2023 Mar 24:2023.03.22.533831. Preprint. [Version 1] doi: 10.1101/2023.03.22.533831 (PMC10055431; doi:10.1101/2023.03.22.533831), 2023-03-24
Supplement: NIHPP2023.03.22.533831v1-supplement-1.pdf [file NIHPP2023.03.22.533831v1-supplement-1.pdf]

## Supplementary Figures

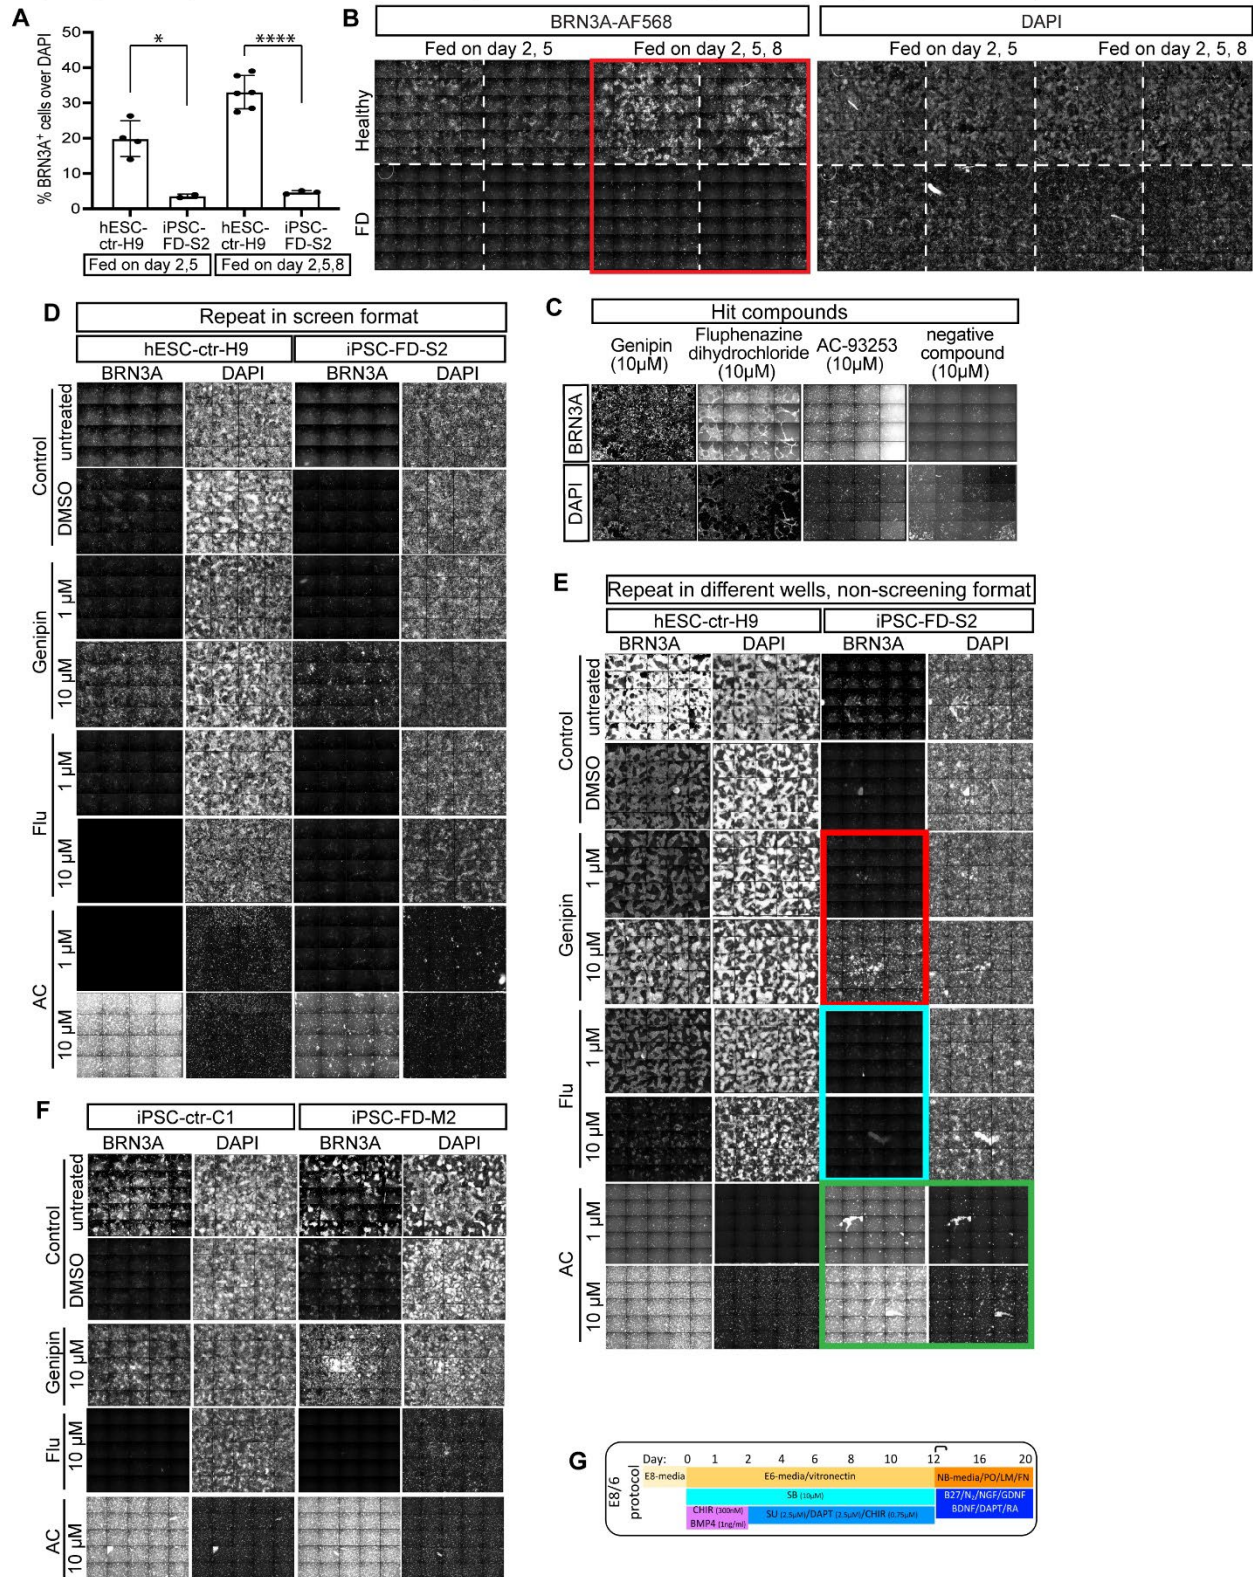

**Supplementary Figure 1. Adaptation of the SN differentiation protocol to high-throughput screening conditions and hit validation.** **A)** Quantification of the number of BRN3A<sup>+</sup> SNs over total DAPI<sup>+</sup> cells. Two-tailed Student's t-test, \*p<0.01. **B)** Imaging of 30 fields per 96 well for each condition. **C)** Example wells are shown from the screen. **D)** Repeat of the SN differentiation in the presence of the hit compounds in 96 wells in screening conditions outlined in Fig. 1C. Whole wells are shown, imaged in 16 tiles. **E)** Repeat of SN differentiation in the presence of the hit compounds in a different well format, i.e. 48 wells and using non-screening conditions outlined in Fig. 1A. Whole wells are shown, imaged in 25 tiles. **F)** Effect of hit compounds tested on additional cell lines, i.e. healthy iPSCs and FD iPSCs from patients with mild FD symptoms (iPSC-FD-M2). Non-screening differentiation conditions were used in a 48 well format. All differentiations were performed in KSR conditions. **G)** Schematic representation of the SN differentiation in E8/E6 conditions (as previously reported<sup>1</sup>).

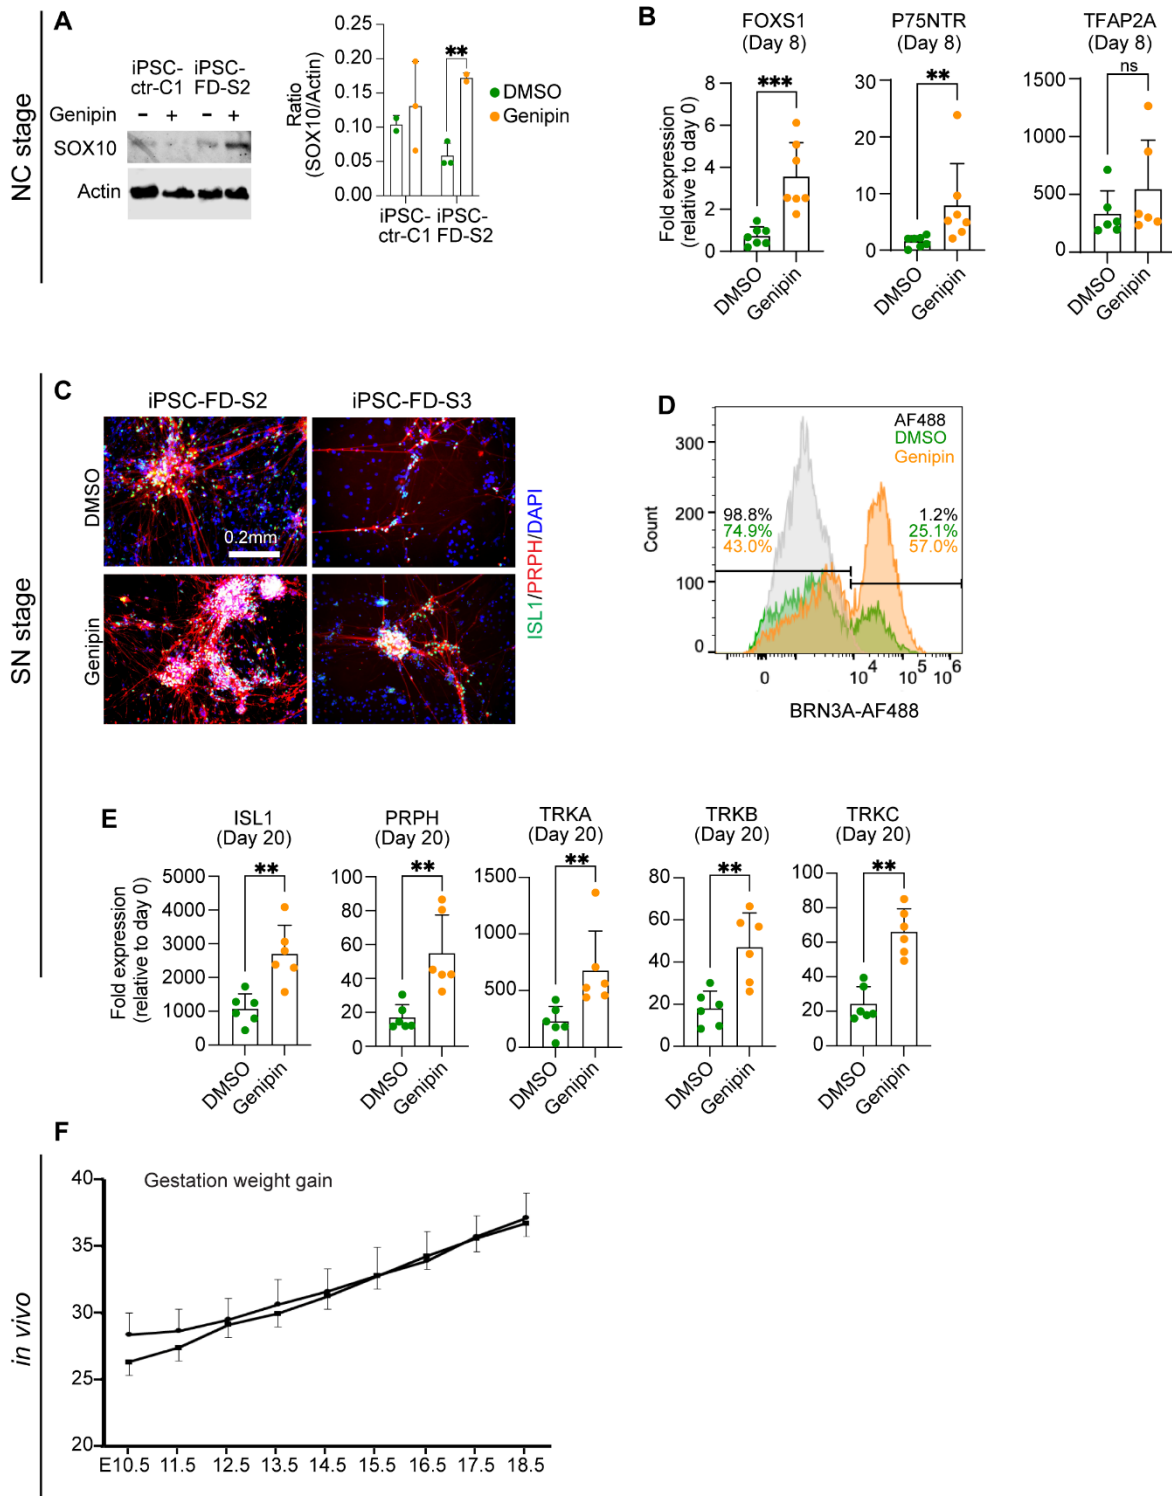

**Supplementary Figure 2. *in vitro* and *in vivo* developmental phenotypes in FD are rescued by genipin (related to Fig.3 and Fig. 4).** **A)** Immunoblotting of SOX10 from day 12 NC cells. Representative blot is shown (left) and quantification (right, n=2-3 biological replicates). **B)** RT-qPCR-based gene expression analysis of SN-primed NC at day 8 (n=6-7 biological replicates). **C)** Genipin restores SN differentiation. Day 20 SNs were treated with genipin and fixed and stained using the indicated antibodies (n=5 biological replicates). **D)** Representative histogram of BRN3A signal measured by flow cytometry. **E)** RT-qPCR-based gene expression analysis of SNs at day 20 (n=6 biological replicates). **F)** Gestational female weight gain in genipin-treated (squares, n=6) and untreated (circles, n=3) dams. For **A**, **B** and **D**, Two-tailed Student's t-test. ns, non-significant, \*\*p<0.005, \*\*\*p<0.001. All graphs show mean  $\pm$  s.d. For **B** and **D**, iPSC-FD-S2 and iPSC-FD-S3 data are pooled as FD.

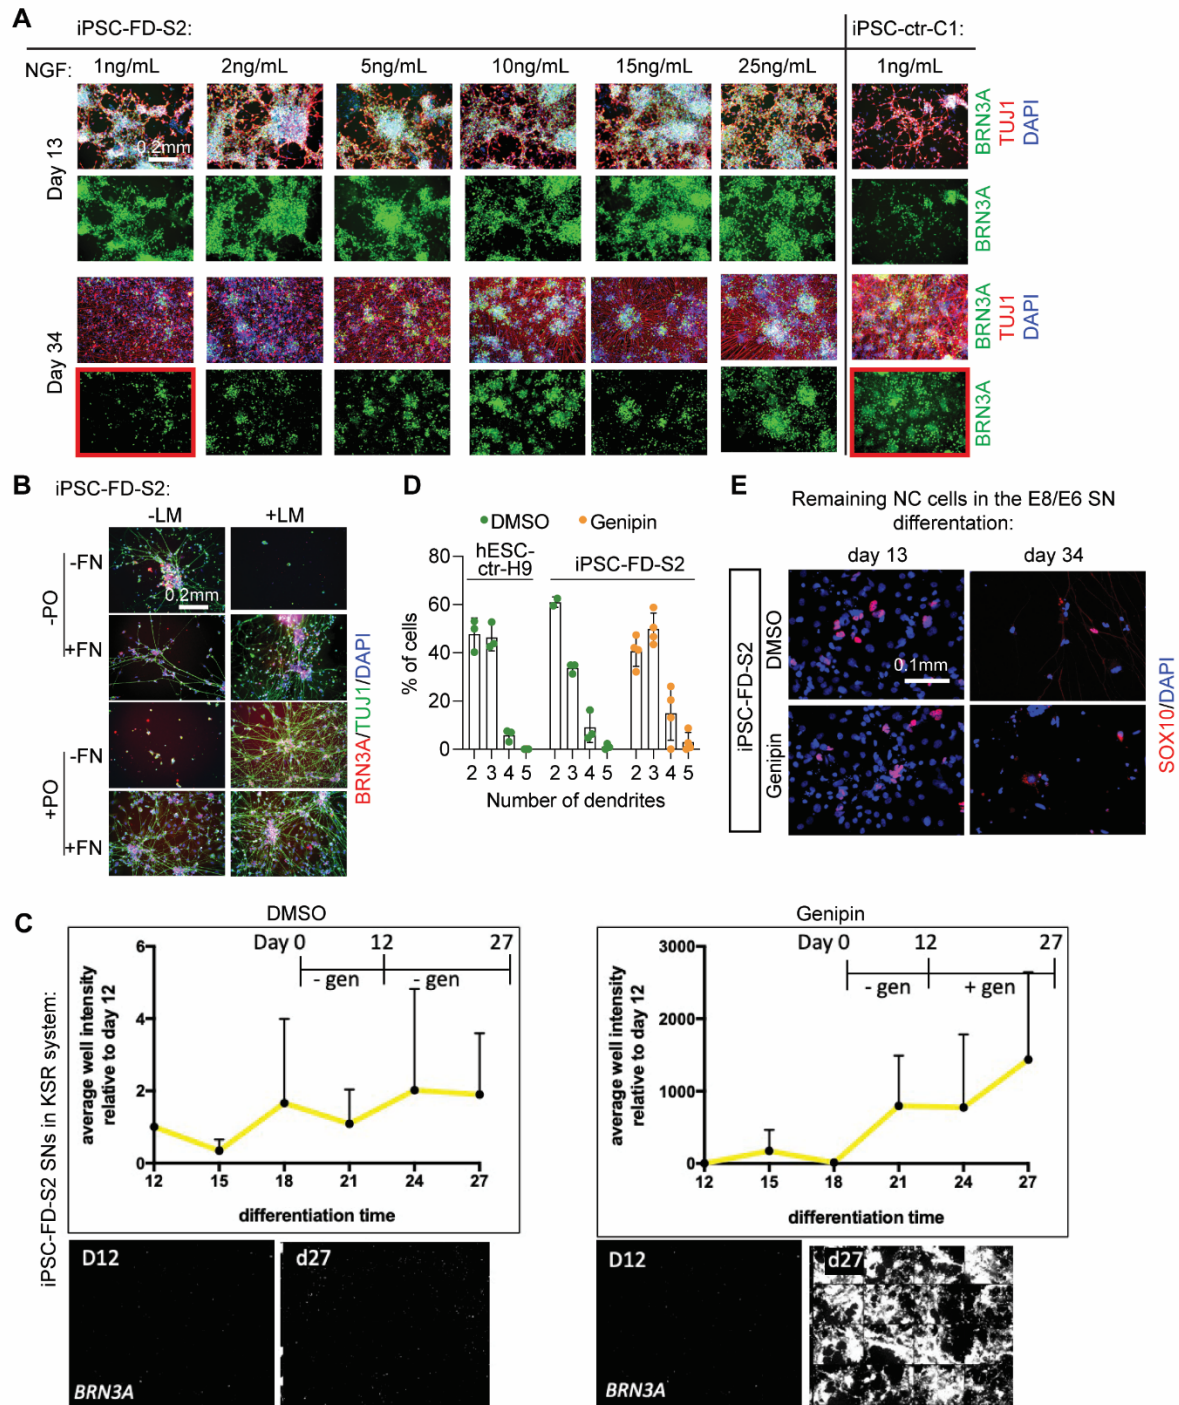

### Supplementary Figure 3. SN survival assay adaptation and characterization

(related to Fig 5). **A**) NGF titration to assess SN survival over 21 days by IF in iPSC-

FD-S2 and healthy iPSC-ctr-C1 cells. **B)** Exclusion experiment to assess which of the surface coating proteins LM, PO, FN are required in iPSC-FD-S2 SNs. **C)** Survival assay performed in KSR conditions (Fig 1A). 16-tile images are shown of SNs at day 12 and day 27, with or without genipin treatment (bottom). Quantification of BRN3A signal intensity is plotted relative to day 12 (top). **D)** Number of neurites of hPSC-ctr-H9 and iPSC-FD-S2 SNs differentiated in the presence of genipin (10  $\mu$ M) were quantified. n=2-4 biological replicates. **E)** Few SOX10+ NC cells are present in the SN differentiation at day 13 and 20. All graphs show mean  $\pm$  s.d.

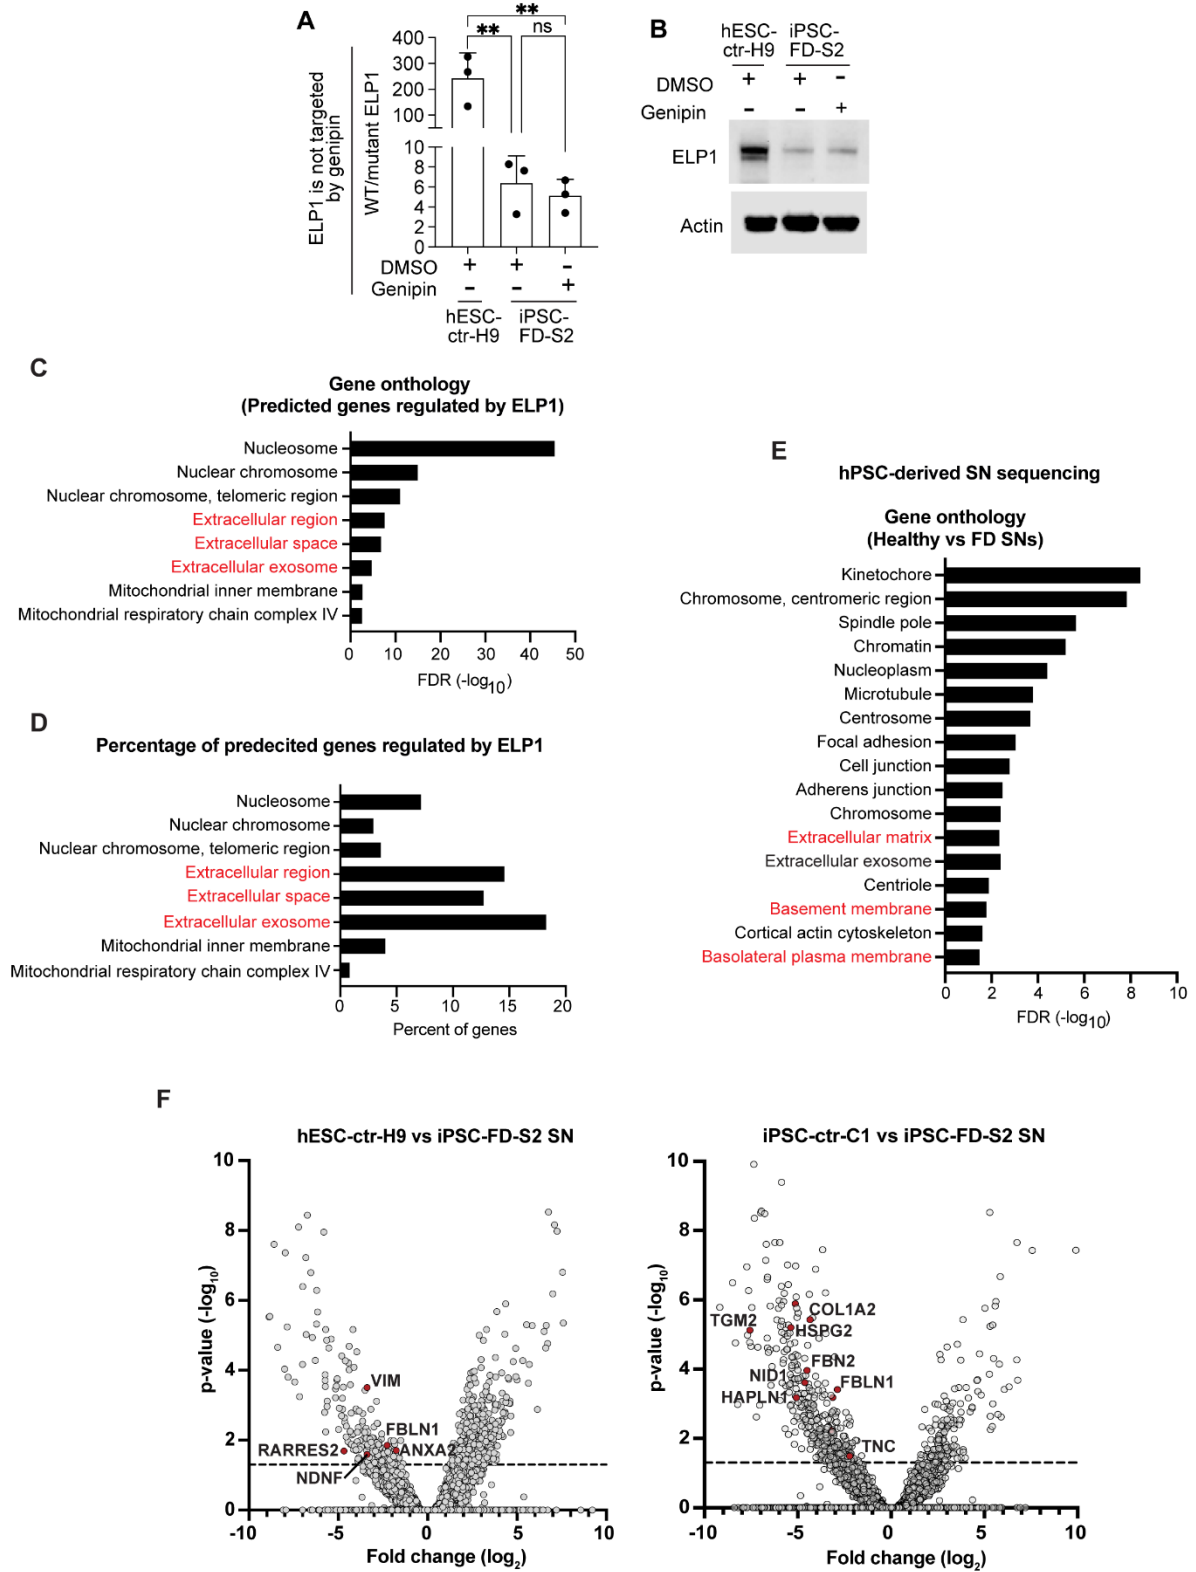

**Supplementary Figure 4. Effects of genipin in ELP1 and expression of ECM-**

**related genes in FD mouse and iPSC-derived FD SNs. A)** Treatment with genipin of NC cells up to day 8 does not alter *ELP1* splicing inefficiency (RT-qPCR). n=3 biological replicates. one-way ANOVA followed by Tukey's multiple comparisons. ns, non-significant, \*\*p<0.005. **B)** Genipin does not change ELP1 protein levels in FD (immunoblot). n=3 biological replicates. Representative blot is shown. **C,D)** Analysis of genes predicted to be controlled by Elp1 in FD mouse. **C)** Gene ontology of predicted genes that are regulated by Elp1. **D)** Percentage of genes predicted to be regulated by Elp1. **E, F)** RNA sequencing in hPSC-derived SNs comparing healthy (hPSC-ctr-H9 and iPSC-ctr-C1) versus FD (iPSC-FD-S2). **E)** Gene ontology analysis of significantly downregulated genes in FD vs healthy SNs. **F)** Differential gene expression of hPSC-ctr-H9 vs FD SNs (left) and iPSC-ctr-C1 vs FD SNs (right). ECM-related genes downregulated in FD are highlighted. Dotted line indicates significance threshold (p<0.05).



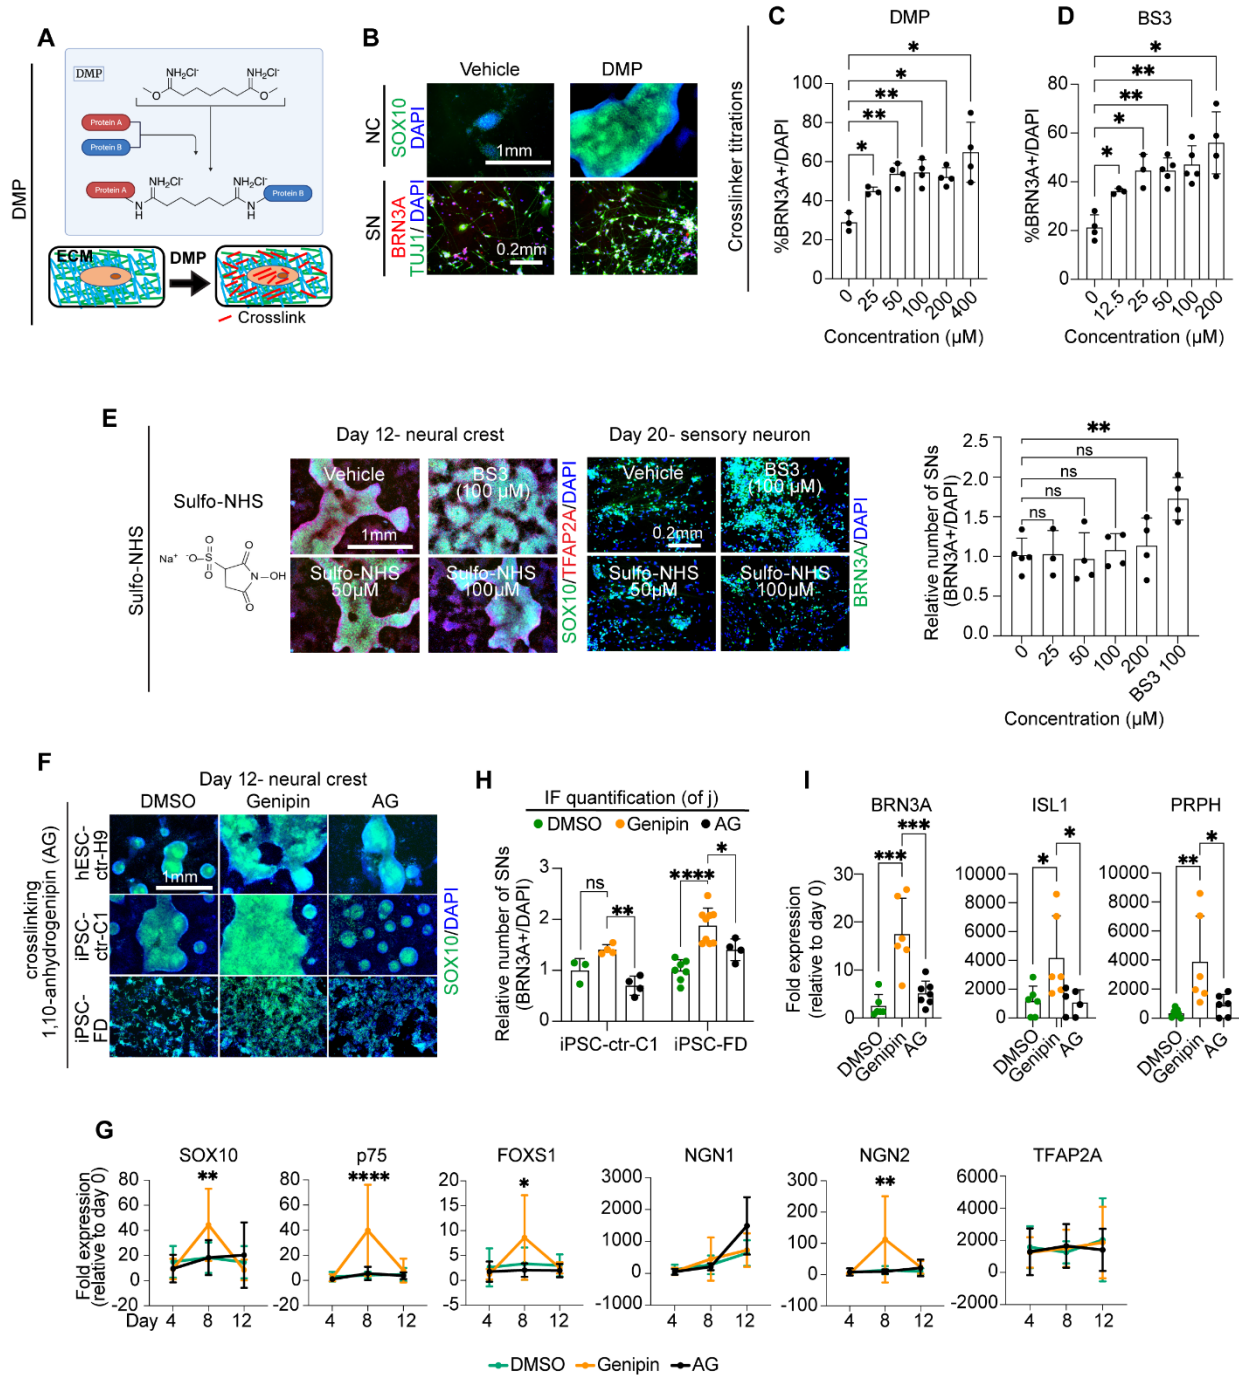

**Supplementary Figure 5. Genipin's mode of action is through crosslinking of ECM proteins (related to Fig 6). A)** Schematic of DMP crosslinking action and its intracellular/extracellular location. **D)** DMP rescues the NC and SN differentiation defect in FD. iPSC-FD-S2 cells were differentiated in the presence of DMP and fixed on day 12

(NC) and day 20 (SN). Following staining using the indicated antibodies. n=3-4 biological replicates.

**C)** DMP titration on iPSC-FD-S2-derived SNs on day 20. n=3-4 biological replicates. one-way ANOVA followed by Tukey's multiple comparisons. \* $p < 0.05$ , \*\* $p < 0.005$ .

**D)** BS3 titration on iPSC-FD-S2-derived SNs on day 20. n=3-5 biological replicates. one-way ANOVA followed by Tukey's multiple comparisons. \* $p < 0.05$ , \*\* $p < 0.005$ . **E)**

Sulfo-NHS (inactive BS3) does not rescue NC formation, nor SN formation in iPSC-FD-S2 cells. n=3-5 biological replicates. one-way ANOVA followed by Tukey's multiple

comparisons. ns, non-significant, \*\* $p < 0.005$ . **F)** Genipin that has been chemically altered to delete its crosslinking effects (1,10-anhydrogenipin) is not capable to rescue

NC formation in FD cells. **G-I)** 1,10-anhydrogenipin does not properly restore NC cells

(**G**) or SNs (**H** and **I**) compared to genipin. Assessed by RT-qPCR (**G** and **I**) and IF quantification (**H**, related to **Fig. 6H**). For **G**, n=7-8 biological replicates. Two-way

ANOVA followed by Šídák multiple comparisons. For **H** and **I**, n=6-8 biological

replicates. one-way ANOVA followed by Tukey's multiple comparisons. \* $p < 0.05$ ,

\*\* $p < 0.005$ , \*\*\* $p < 0.001$ , \*\*\*\* $p < 0.0001$ . All graphs show mean  $\pm$  s.d. For **F**, **G**, **H**, and **I**,

iPSC-FD-S2 and iPSC-FD-S3 data are pooled as FD.

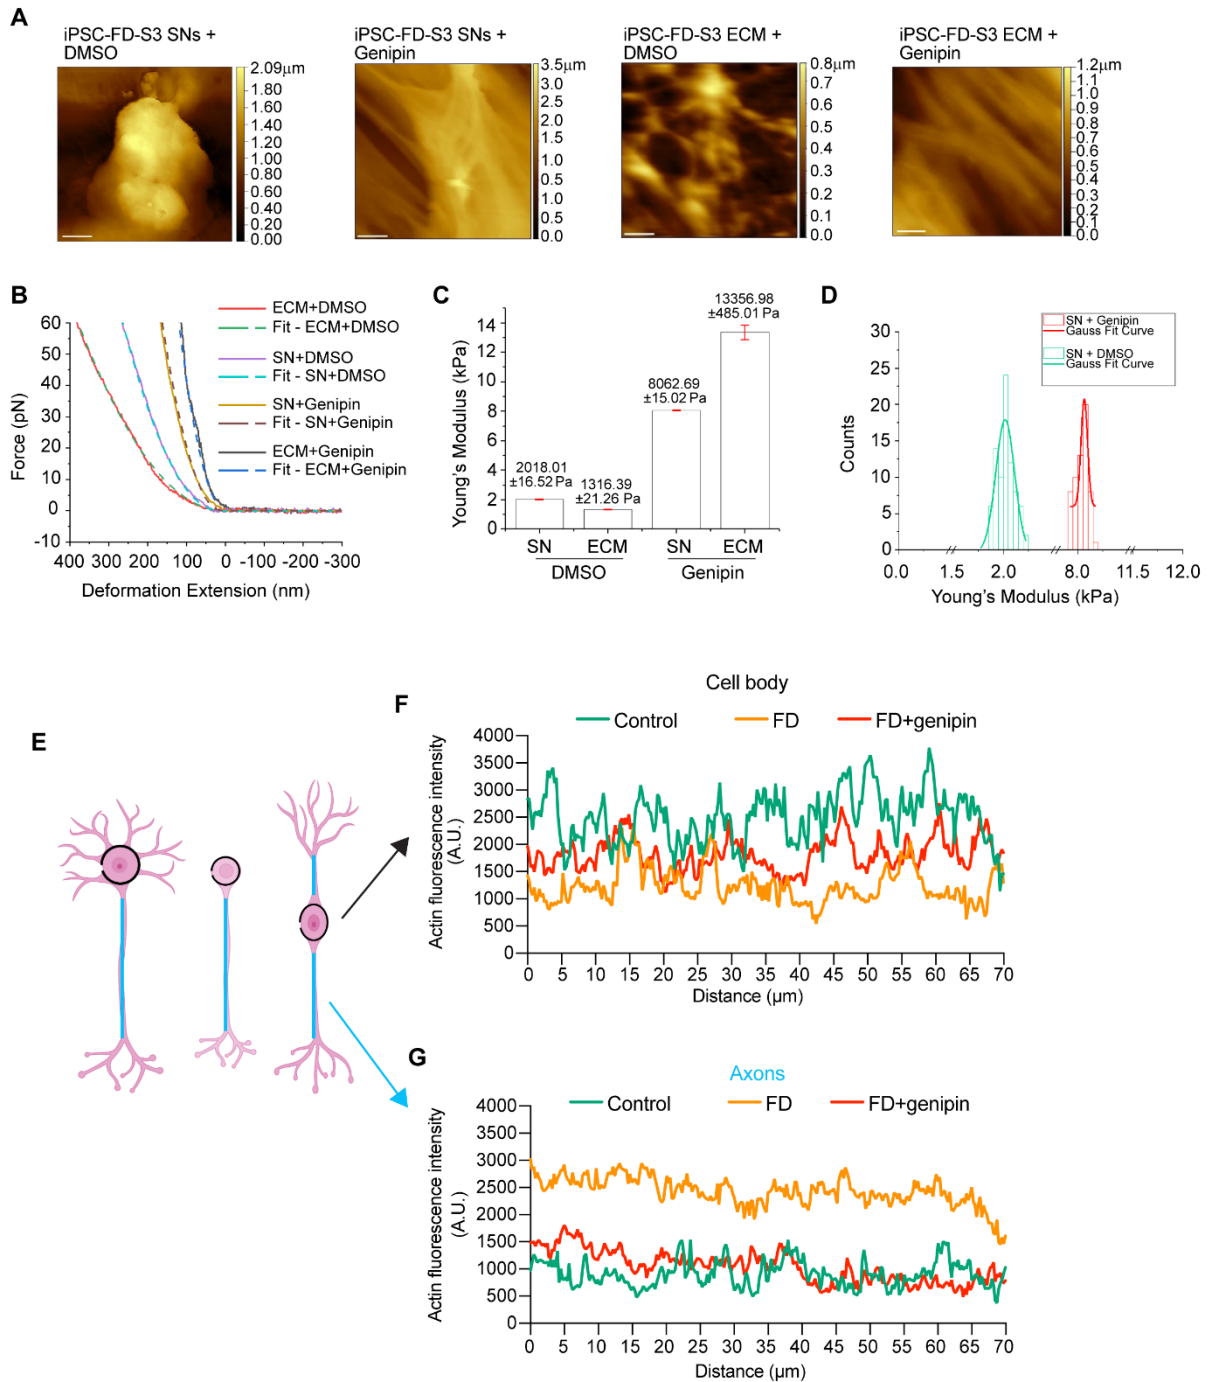

**Supplemental Figure 6. Effects of Genipin crosslinking of ECM (related to Fig 6).**

**A)** AFM topographic images (Scale bar: 10 $\mu$ m). **B)** Force-distance curves (solid)

recorded by force spectroscopy, along with Hertz model fitted curves (dash) which was used to calculate the Young's Modulus. **C)** Comparison of Young's Modulus for four different samples from a representative experiment. **D)** Histogram of Young's Modulus for SNs in DMSO (green) and genipin (red) with Gaussian distribution. A Gaussian distribution fit curve is overlaid to highlight sample variability. **E)** Schematics for actin signal measurement in cell bodies (black) and axons (blue) in SNs with different *in vitro* morphology. **F, G)** Quantification of actin signal intensity from images in **Fig.6K** (n=7-10 cells from 3 biological replicates).

## Supplementary tables

| Category            | Parameter                                | Description                                                                                                            |
|---------------------|------------------------------------------|------------------------------------------------------------------------------------------------------------------------|
| Assay               | Type of assay                            | IF staining                                                                                                            |
|                     | Target                                   | Increase in sensory neuron differentiation                                                                             |
|                     | Primary measurement                      | IF staining of BRN3A+ cells                                                                                            |
|                     | Key reagents                             | Differentiated sensory neurons                                                                                         |
|                     | Assay protocol                           | Adapted from Chambers et al., 2012                                                                                     |
|                     | Additional comments                      |                                                                                                                        |
| Library             | Library size                             | 640 compounds, i.e. half of the LOPAC library                                                                          |
|                     | Library composition                      | Cell signaling and neuroscience                                                                                        |
|                     | Source                                   | Sigma                                                                                                                  |
|                     | Additional comments                      |                                                                                                                        |
| Screen              | Format                                   | 96 well plates                                                                                                         |
|                     | Concentration(s) tested                  | 1mM and 10mM                                                                                                           |
|                     | Plate controls                           | DMSO treated wells, healthy hPSCs (+ control) and disease cells without compounds (- control)                          |
|                     | Reagent/ compound dispensing system      | Manual multi-pipettor                                                                                                  |
|                     | Detection instrument and software        | MetaXPress software: Cell scoring Module from Molecular Devices                                                        |
|                     | Assay validation/QC                      | + and – controls and DMSO only wells (see above)                                                                       |
|                     | Correction factors                       | n/a                                                                                                                    |
|                     | Normalization                            | DAPI+ cells and DMSO only treated wells                                                                                |
| Additional comments |                                          |                                                                                                                        |
| Post-HTS analysis   | Hit criteria                             | Phenotype reproducible in screening and non-screening format                                                           |
|                     | Hit rate                                 | 1                                                                                                                      |
|                     | Additional assay(s)                      | Phenotype reproducible in different well format<br>Phenotype reproducible in additional control and disease hPSC lines |
|                     | Confirmation of hit purity and structure | n/a                                                                                                                    |
|                     | Additional comments                      |                                                                                                                        |

**Supplementary Table 1.** Small molecule screening data

| <b>Compound name</b>         | <b>Screen [c]</b> | <b>Fold change over DMSO (average)</b> |
|------------------------------|-------------------|----------------------------------------|
| DMSO only                    | 10 $\mu$ M        | 4.5                                    |
| hPSC-ctr-H9 in DMSO          | 10 $\mu$ M        | 7.7                                    |
| iPSC-FD in DMSO              | 10 $\mu$ M        | 1.6                                    |
| Fluphenazine dihydrochloride | 10 $\mu$ M        | 17.5                                   |
| AC-93253 iodide              | 1 $\mu$ M         | 16.5                                   |
| genipin                      | 1 $\mu$ M         | 14.2                                   |
| genipin                      | 10 $\mu$ M        | 16.1                                   |

**Supplementary Table 2. Hit compounds**

|              | Total embryos | Live embryos | Resorptions | Number of litters |
|--------------|---------------|--------------|-------------|-------------------|
| No treatment | 46            | 40           | 6           | 6                 |
| + Genipin    | 44            | 41           | 3           | 6                 |

**Supplementary Table 3.** Genipin does not affect normal embryonic development
